# Supplementary material for: The American Paddlefish Genome Provides Novel Insights into Chromosomal Evolution and Bone Mineralization in Early Vertebrates
Source: PubMed Central journal article supplement (PMC8042750; doi:10.1093/molbev/msaa326), 2020-12-17
Supplement: msaa326_supplementary_data.pdf [file msaa326_supplementary_data.pdf]

## Supplementary Materials for

### **The American paddlefish genome provides novel insights into chromosomal evolution and bone mineralization in early vertebrates**

<sup>1</sup>Peilin Cheng<sup>†</sup>, <sup>2</sup>Yu Huang<sup>†</sup>, <sup>2,5</sup>Yunyun Lv<sup>†</sup>, <sup>1</sup>Hao Du, <sup>2</sup>Zhiqiang Ruan, <sup>1</sup>Chuangju Li, <sup>1</sup>Huan Ye, <sup>1</sup>Hui Zhang, <sup>1</sup>Jinming Wu, <sup>1</sup>Chengyou Wang, <sup>1</sup>Rui Ruan, <sup>2,5</sup>Yanping Li, <sup>2</sup>Chao Bian, <sup>2</sup>Xinxin You, <sup>3</sup>Chengcheng Shi, <sup>3</sup>Kai Han, <sup>2</sup>Junming Xu, <sup>2,4</sup>Qiong Shi\*, <sup>1</sup>Qiwei Wei\*.

<sup>1</sup>Key Laboratory of Freshwater Biodiversity Conservation, Ministry of Agriculture and Rural Affairs of P. R. China, Yangtze River Fisheries Research Institute, Chinese Academy of Fishery Sciences, Wuhan 430223, China.

<sup>2</sup>Shenzhen Key Lab of Marine Genomics, Guangdong Provincial Key Lab of Molecular Breeding in Marine Economic Animals, BGI Academy of Marine Sciences, BGI Marine, BGI, Shenzhen 518083, China.

<sup>3</sup>BGI-Qingdao, BGI-Shenzhen, Qingdao 266555, China.

<sup>4</sup>Laboratory of Marine Genomics, School of Life Sciences and Oceanography, Shenzhen University, Shenzhen 518060, China.

<sup>5</sup>Key Laboratory of Sichuan Province for Fishes Conservation and Utilization in the Upper Reaches of the Yangtze River, Neijiang Normal University, Neijiang 641000, China.

<sup>†</sup>These authors contributed equally to this work.

\*Correspondence: Email: shiqiong@genomics.cn (Q.S.); weiqw@yfi.ac.cn (Q.W.), Tel.: +86-185 6627 9826 (Q.S.), +86-180 8600 6888 (Q.W.)

#### **This file includes:**

Figures S1 to S19

Tables S1 to S11

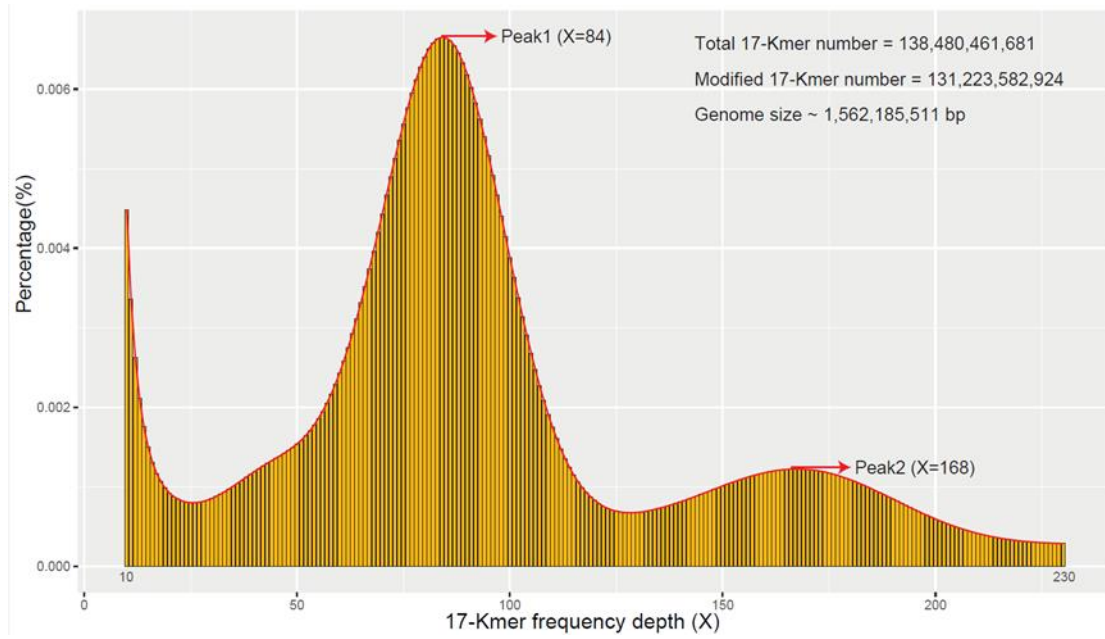

**Figure S1. Genome survey of the American paddlefish using a 17-mer analysis.**

The peaks of homozygous and repeated 17-mers are highlighted. The highest peak (Peak1, X=84) was used to estimate the genome size.

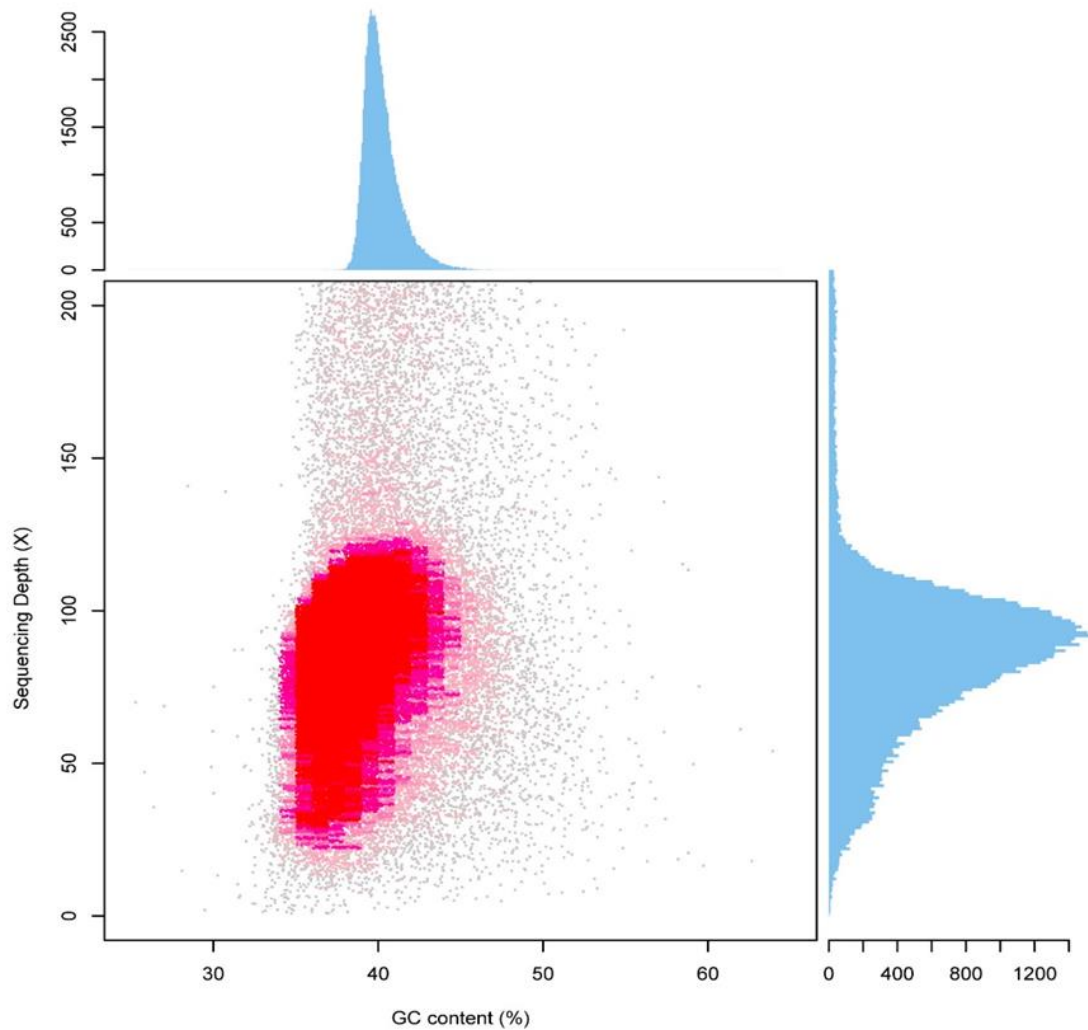

**Figure S2. GC content and sequencing depth of the scaffold assembly.** In the main plot, the X-axis and Y-axis represent GC content proportion and average sequencing depth, respectively. The right and upper bar charts show the numbers of hits at the given sequencing depth or GC content.

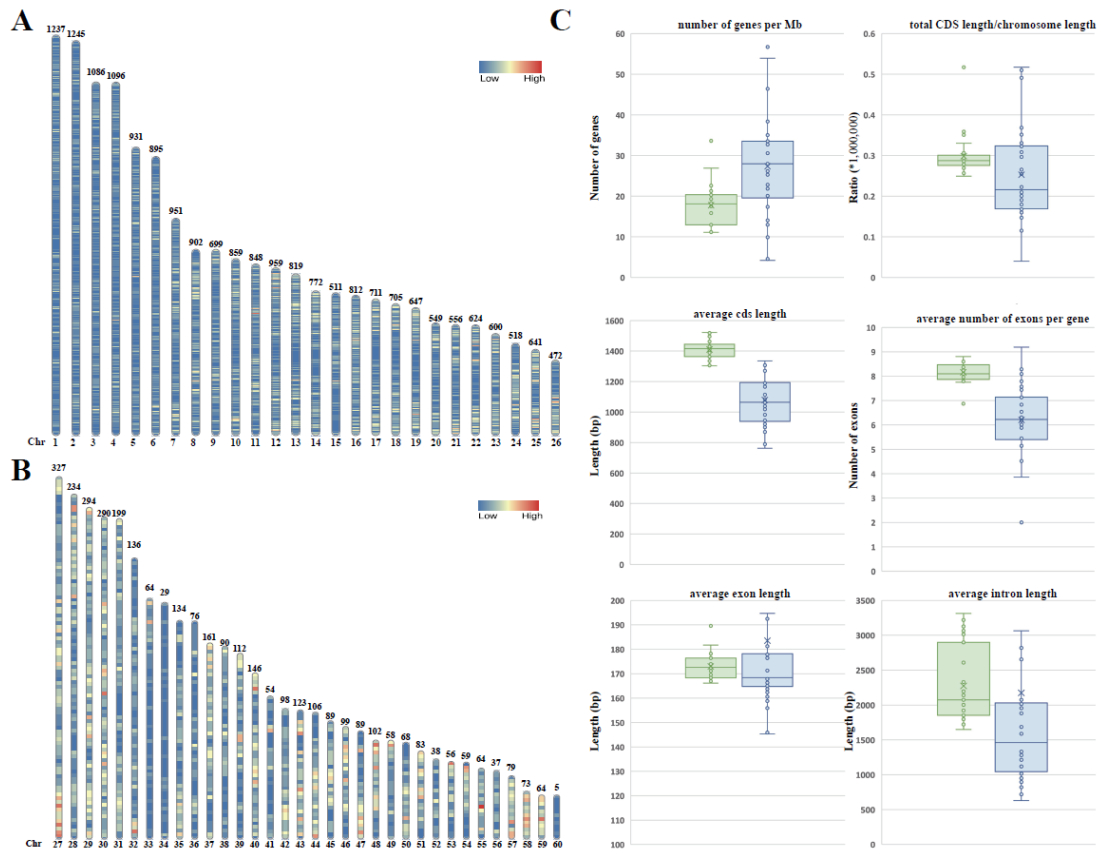

**Figure S3. Gene density varies between macro- and micro-chromosomes of the American paddlefish. (A) Gene density of macrochromosomes. (B) Gene density of microchromosomes. The number on top of each chromosome refers to the number of genes on this chromosome. (C) Box-plots comparing gene number/Mb, total gene length/chromosome length, average CDS length, average exon number/gene, average exon length, and average intron length between macrochromosomes (green boxes) and microchromosomes (blue boxes).**

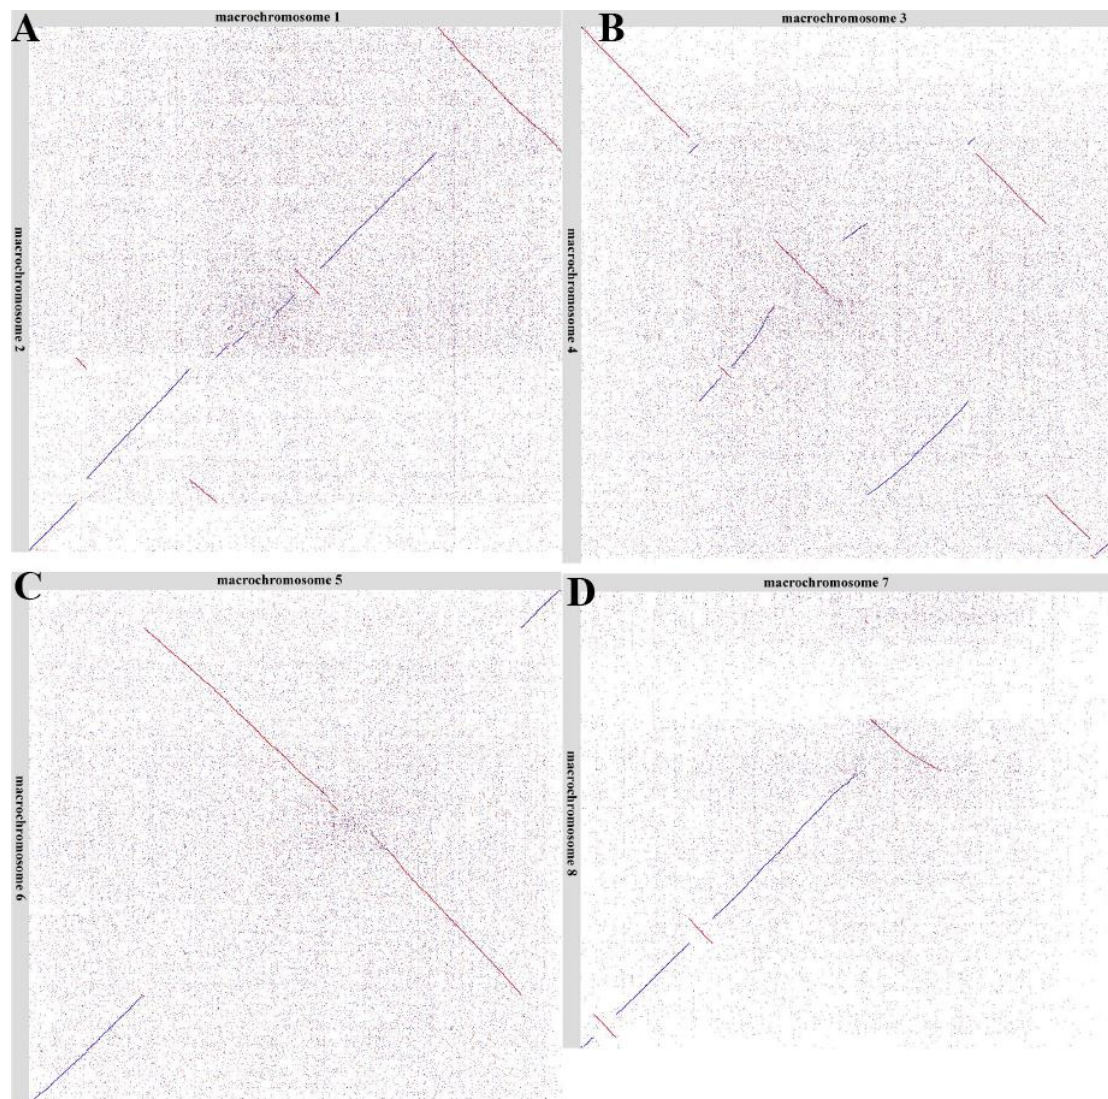

**Figure S4. Dotplots showing sequence alignments between the four longest pairs of paralogous macrochromosomes. (A) Chr1 and Chr2; (B) Chr3 and Chr4; (C) Chr5 and Chr6; (D) Chr7 and Chr8. Forward matches are plotted in red, while reverse alignments are plotted in blue.**

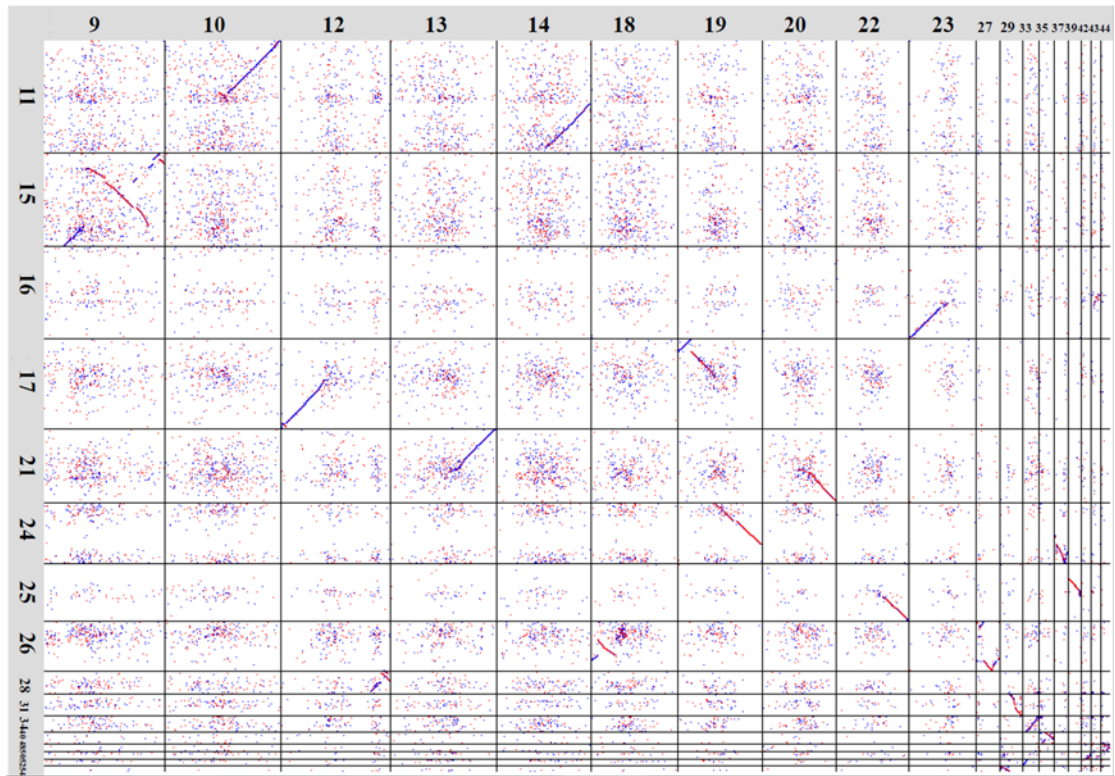

**Figure S5. Dotplots showing sequence alignments between other chromosomes.** X-axis: Chr9, 10, 12, 13, 14, 18, 19, 20, 22, 23, 27, 29, 33, 35, 37, 39, 42, 43, and 44; Y-axis: Chr11, 15, 16, 17, 21, 24, 25, 26, 28, 31, 34, 40, 48, 50, 52, and 54. Forward matches are plotted in red, while reverse alignments are plotted in blue.

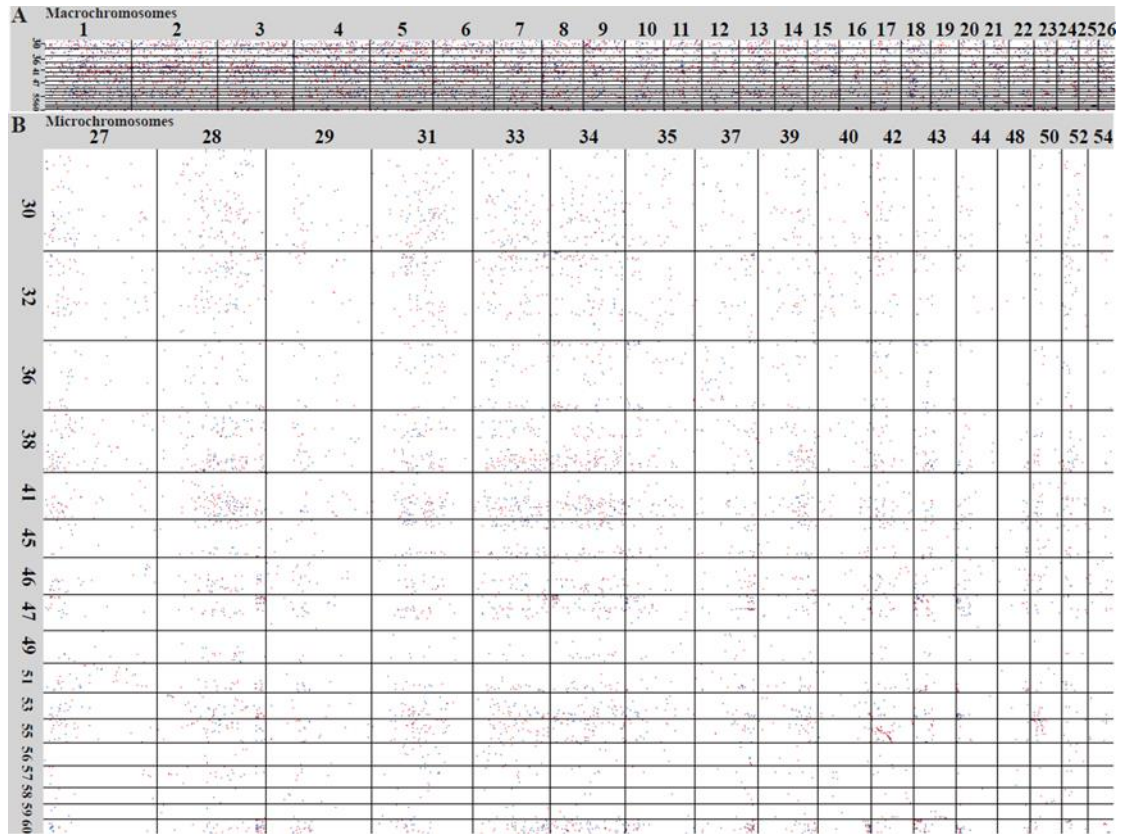

**Figure S6. Dotplots showing unaligned sequences against all macrochromosomes (A) and microchromosomes (B).** From top to bottom, unaligned chromosomes are Chr30, 32, 36, 38, 41, 45, 46, 47, 49, 51, 53, and 55–60.

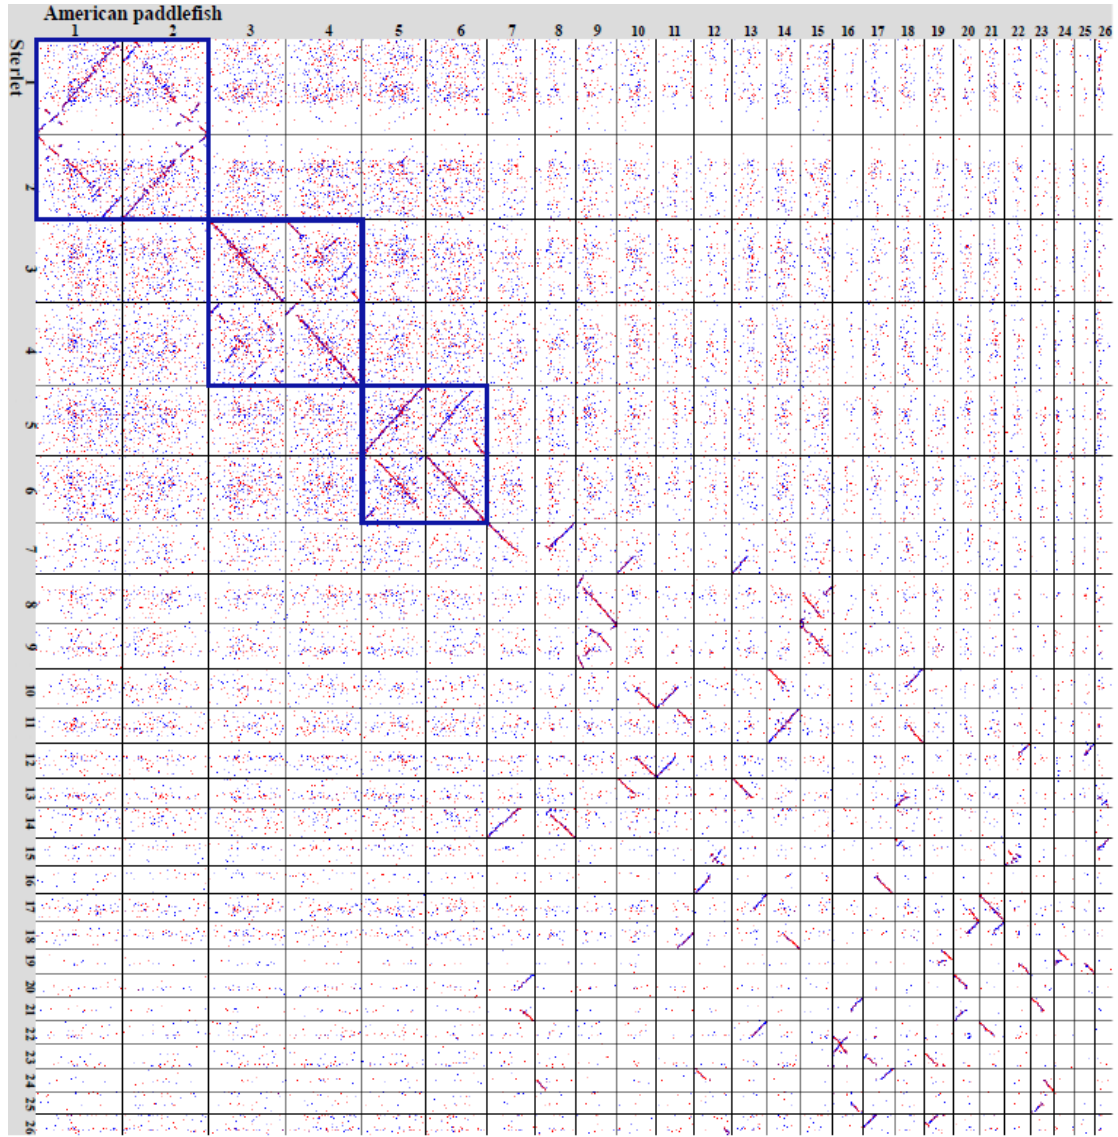

**Figure S7.** Dotplots showing sequence alignments between the 26 pairs of macrochromosomes of the American paddlefish and the sterlet. Boxes indicate the alignments of Chr1 and Chr2, Chr3 and Chr4, Chr5 and Chr6. Forward matches are plotted in red, while reverse alignments are plotted in blue.



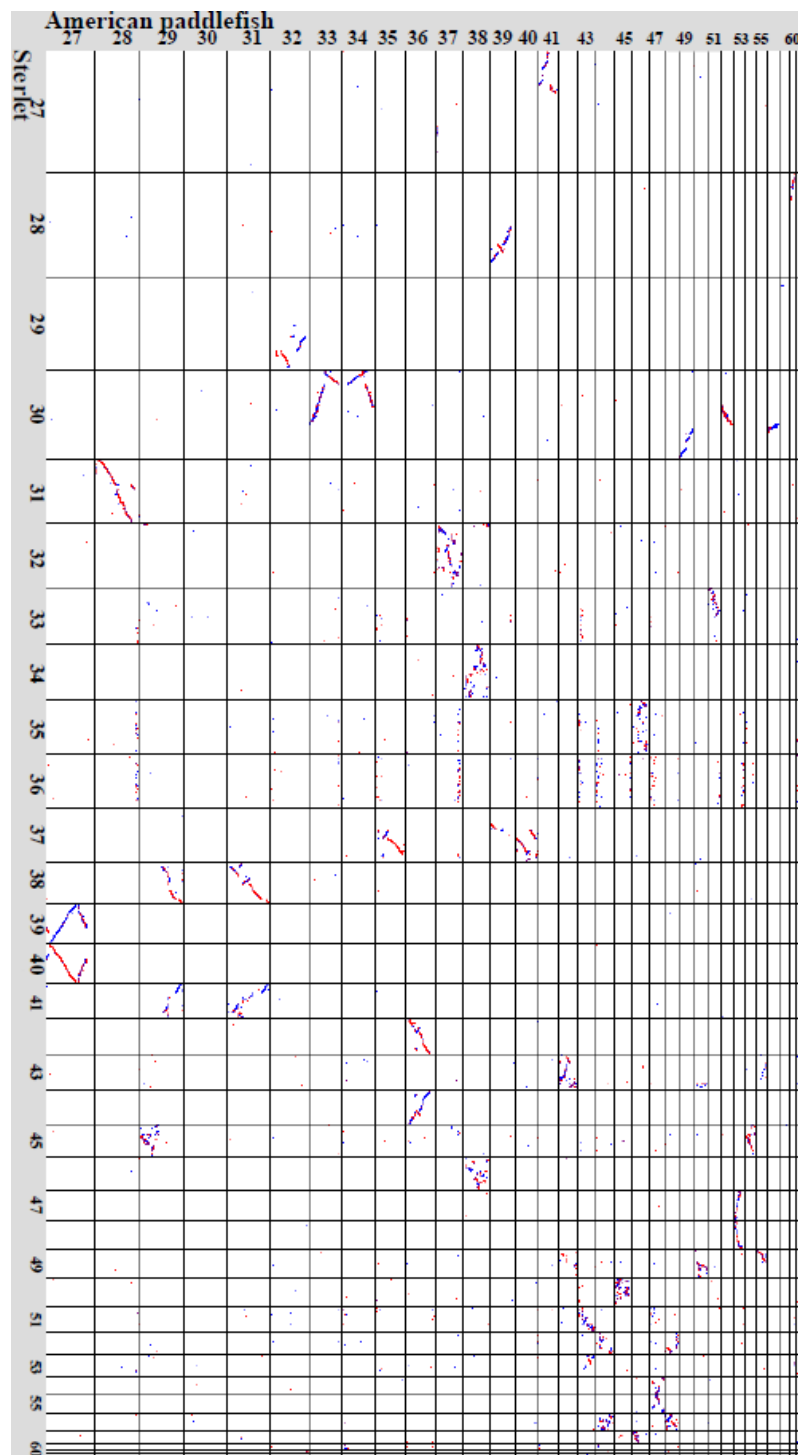

**Figure S8. Dotplots showing sequence alignments between the 34 pairs of microchromosomes of the American paddlefish and the sterlet. Forward matches are plotted in red, while reverse alignments are plotted in blue.**

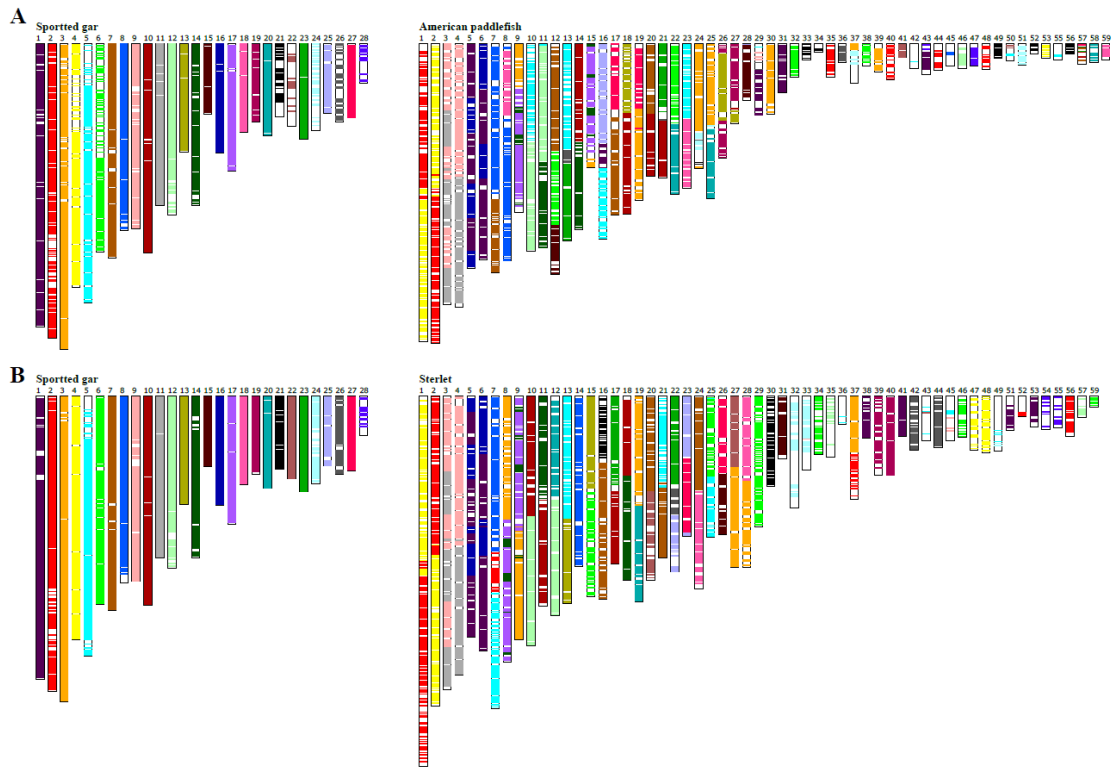

**Figure S9. Synteny between chromosomes of (A) spotted gar and American paddlefish, and (B) spotted gar and sterlet.** Each colored bar refers to a chromosome. The number on top of each bar indicates the chromosome number. Please note that chromosomal length is not the real length, since SynChro uses the number of annotated genes on each chromosome to interpret the synteny blocks. Therefore, if a chromosome (such as sterlet Chr7) is short in length but rich in genes, it will be longer than larger chromosomes with fewer genes (such as Chr5 and 6).

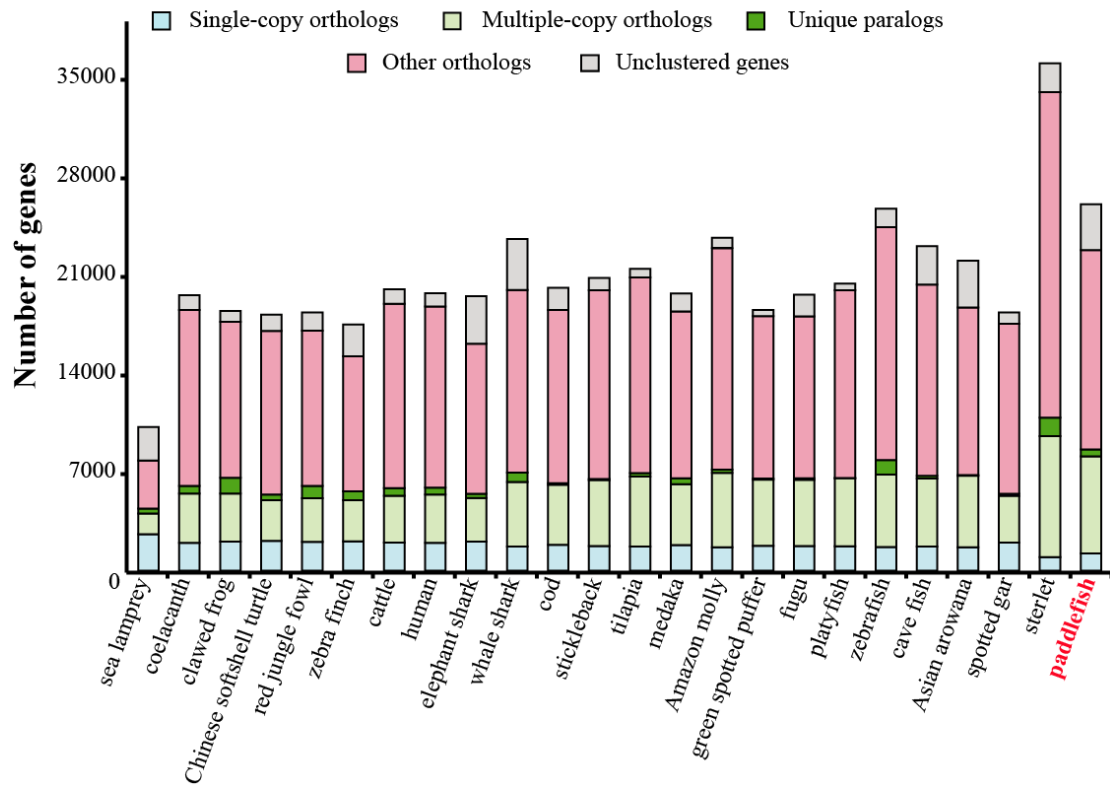

**Figure S10. The number of genes clustered as orthologs and paralogs among paddlefish and other vertebrates.**

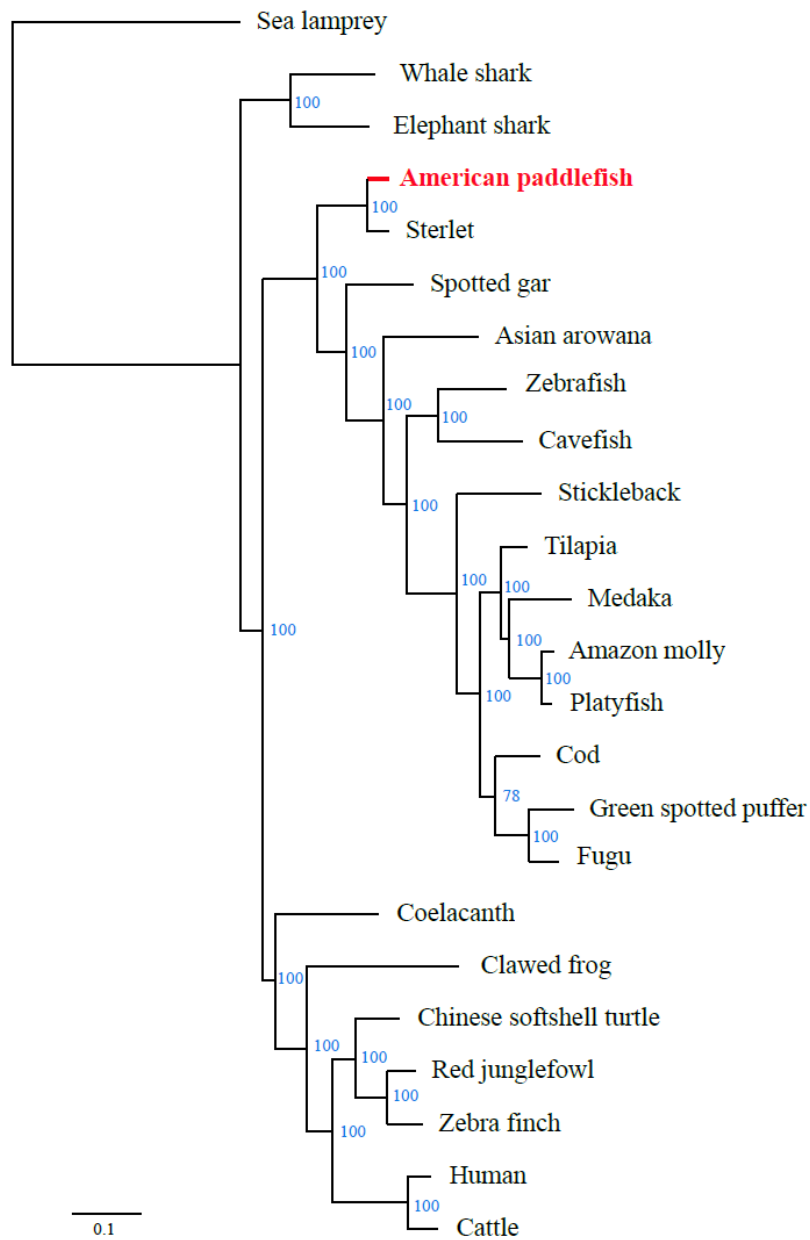

**Figure S11. Original phylogenetic tree based on the maximum likelihood method.**

The red branch marks the position of the American paddlefish. Bootstrap supports are labeled at the nodes.

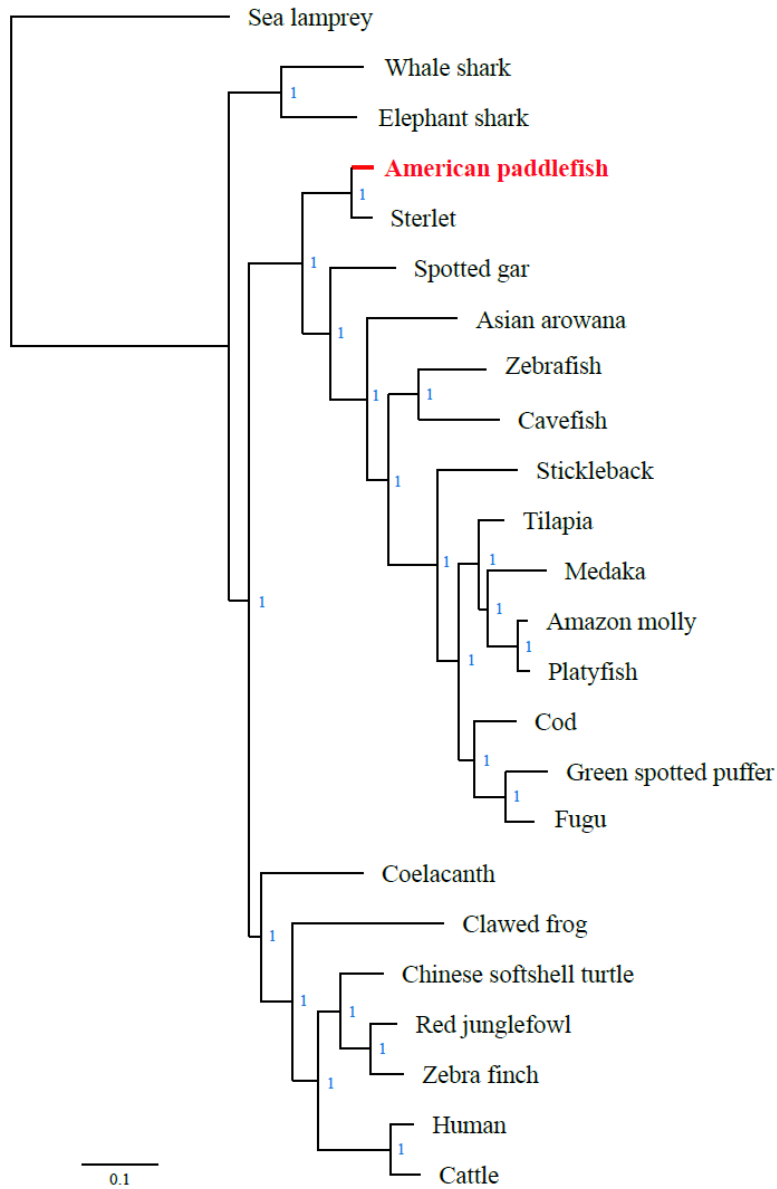

**Figure S12. Original phylogenetic tree based on Bayesian inference.** The red branch marks the position of the American paddlefish. Node support values are Bayesian posterior probabilities.

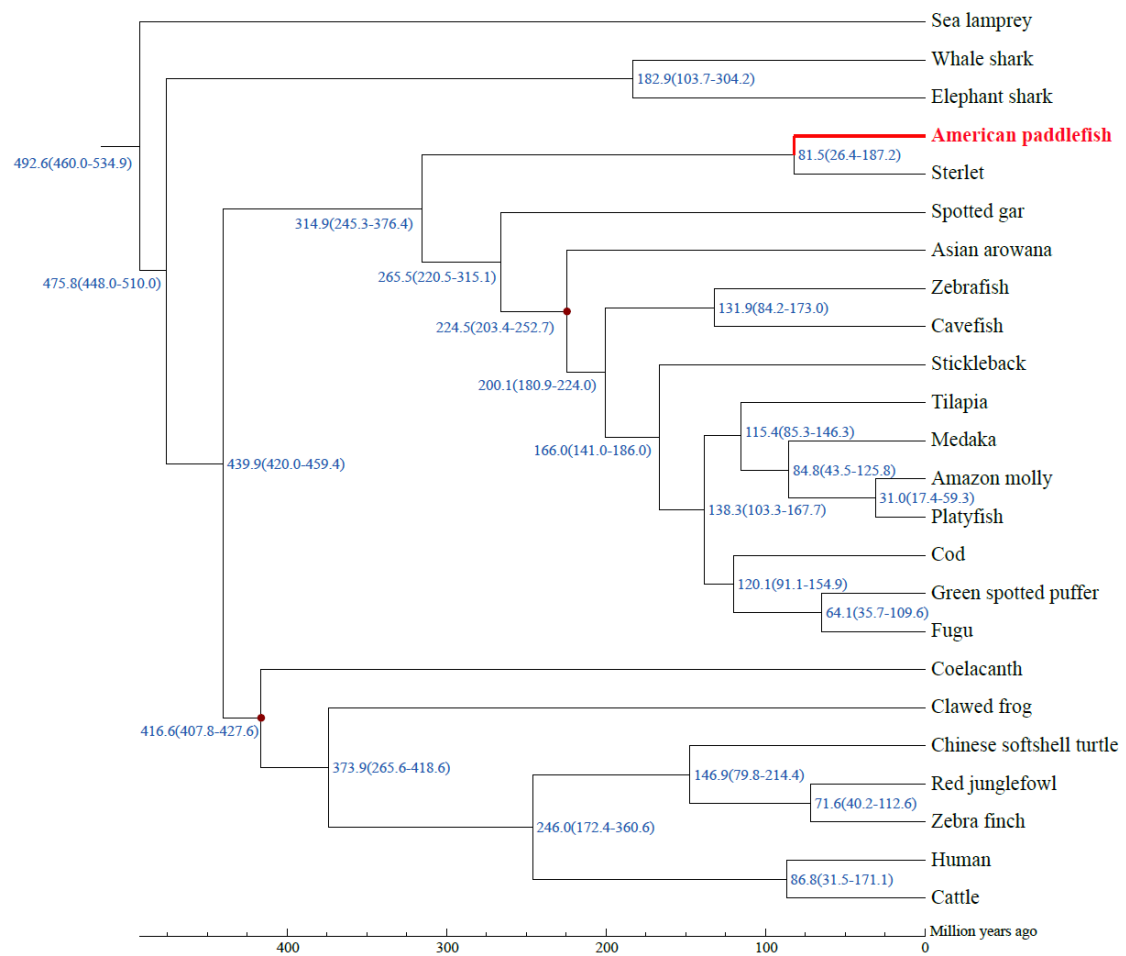

**Figure S13. Divergence time estimation of the American paddlefish and other vertebrates.** The red branch marks the position of the paddlefish. Numbers at each node indicate the divergence time followed by 95% confidence intervals in the bracket.

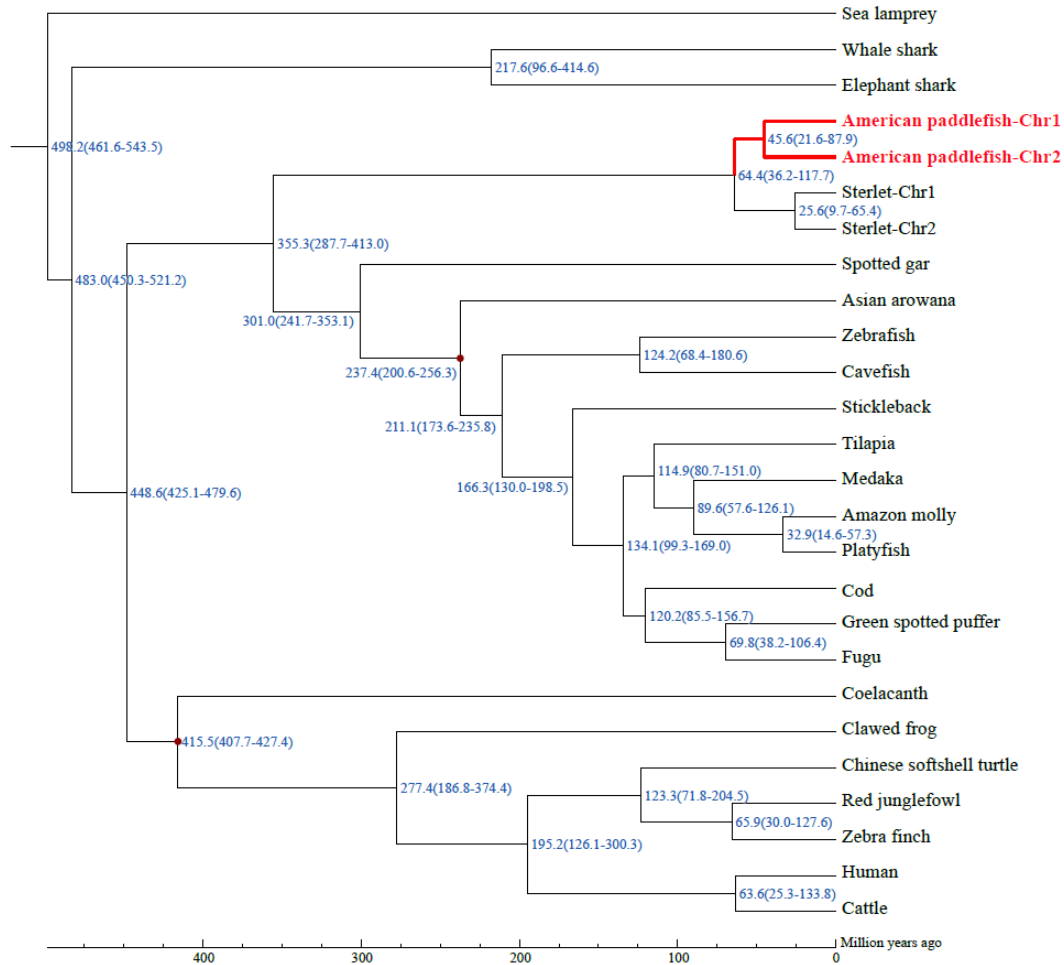

**Figure S14. Divergence time estimation of the American paddlefish macrochromosomes 1 and 2.** The red branches mark the position of paddlefish Chr1 and Chr2. Numbers at each node indicate the divergence time followed by 95% confidence intervals in the bracket.

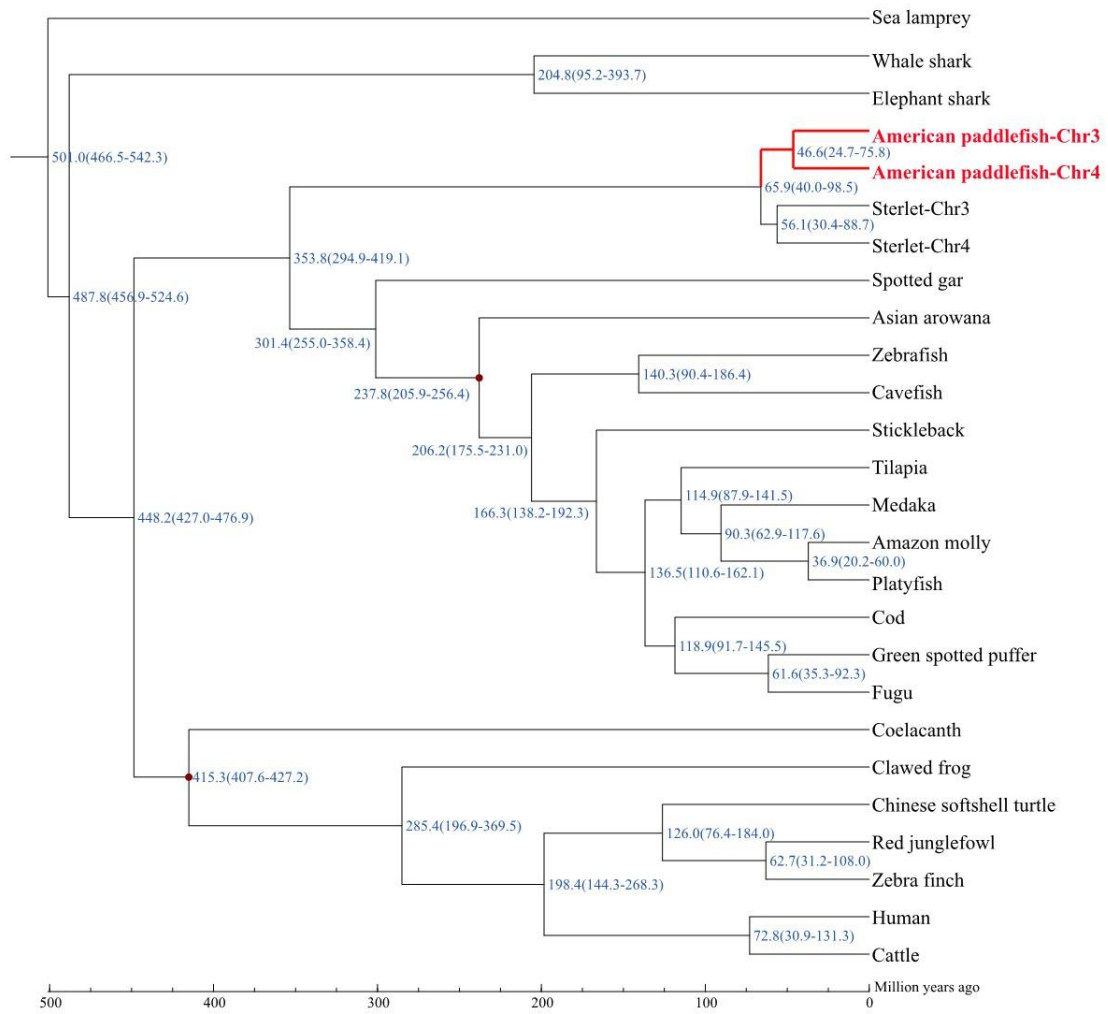

**Figure S15. Divergence time estimation of the American paddlefish macrochromosomes 3 and 4.** The red branches mark the position of paddlefish Chr3 and Chr4. Numbers at each node indicate the divergence time followed by 95% confidence intervals in the bracket.



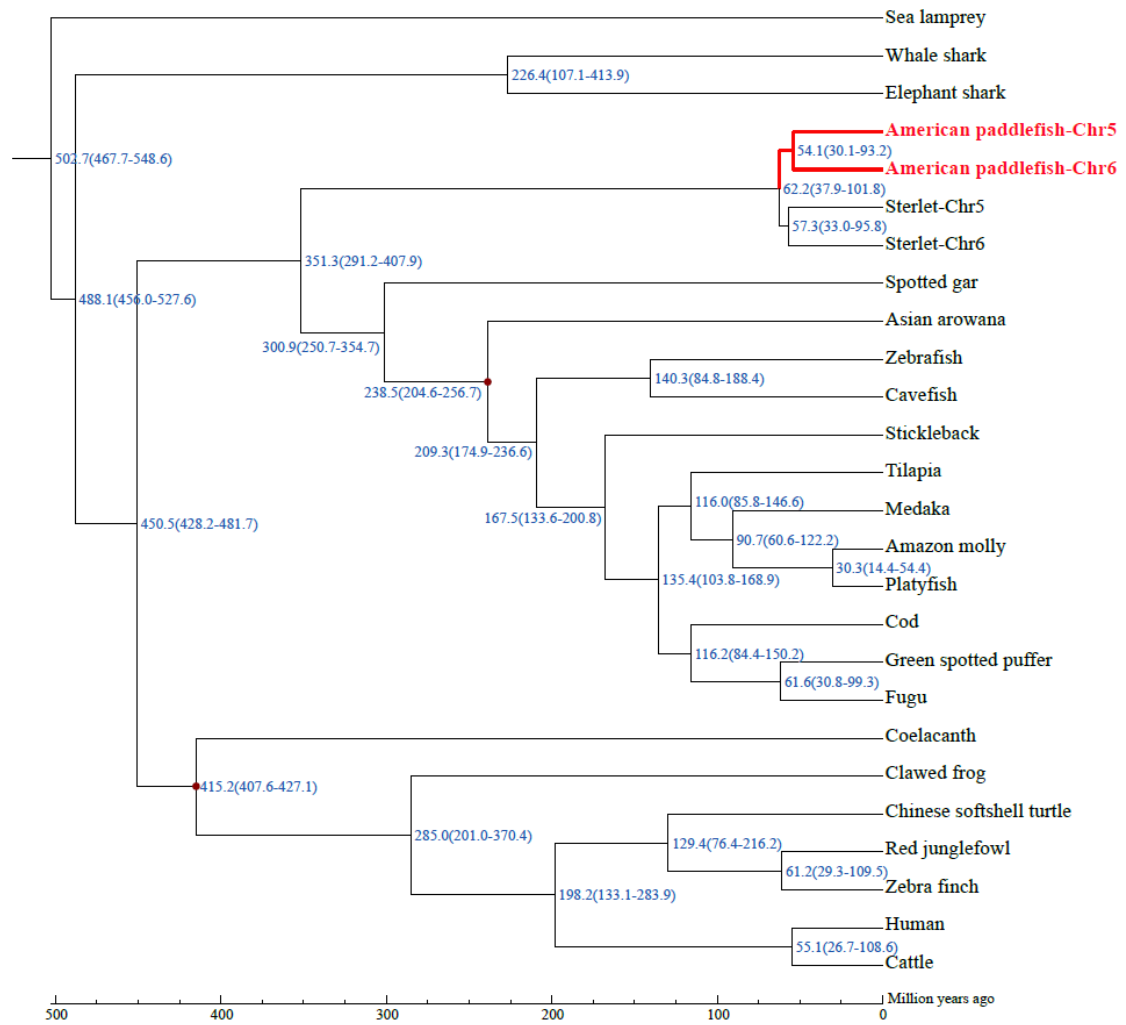

**Figure S16. Divergence time estimation of the American paddlefish macrochromosomes 5 and 6.** The red branches mark the position of paddlefish Chr5 and Chr6. Numbers at each node indicate the divergence time followed by 95% confidence intervals in the bracket.

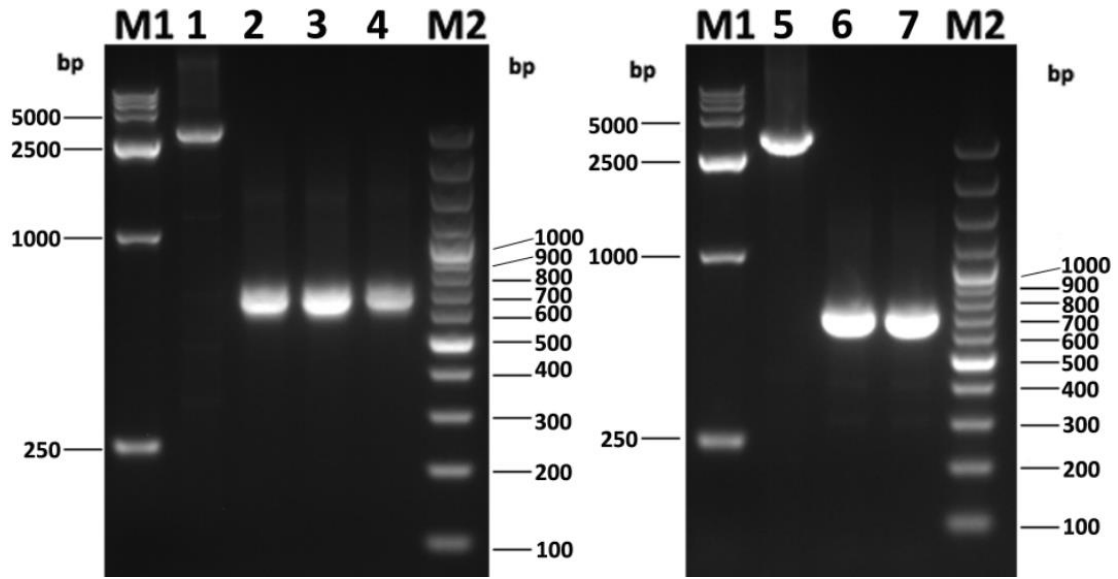

**Figure S17. PCR amplification of the two *spp1* genes identified in the assembled genome.** M1: marker D15000; M2: marker 100 bp plus; 1: *spp1*-1\_1 (Chr1-nested-2 primers); 2: *spp1*-1\_2 (PCR Chr1-F/R1 primers); 3: *spp1*-1\_3 (PCR Chr1-F/R2 primers); 4: *spp1*-1\_4 (PCR Chr1-F/R3 primers); 5: *spp1*-2\_1 (Chr2-nested-2 primers); 6: *spp1*-2\_2 (PCR Chr2-F/R1 primers); 7: *spp1*-2\_3 (PCR Chr1-F/R2 primers).

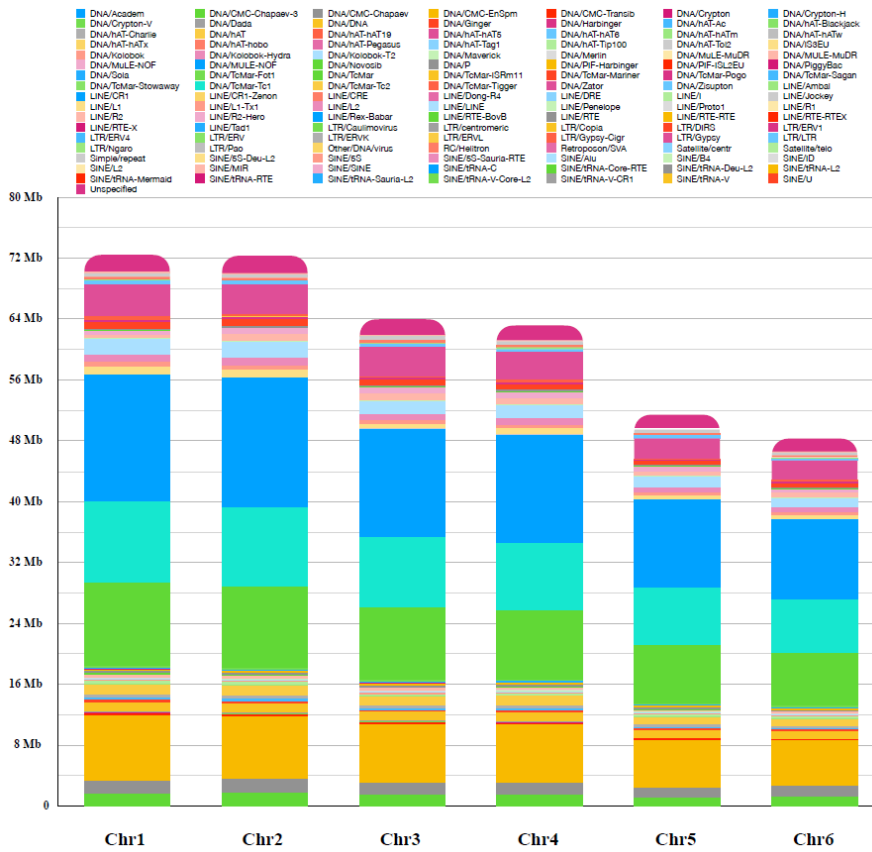

**Figure S18. Repeat contents of the three largest pairs of paralogous chromosomes.** Different colors in each bar refers to different supertypes of repeats in each chromosome. The Y-axis scales the total length of each supertype of the repeats.

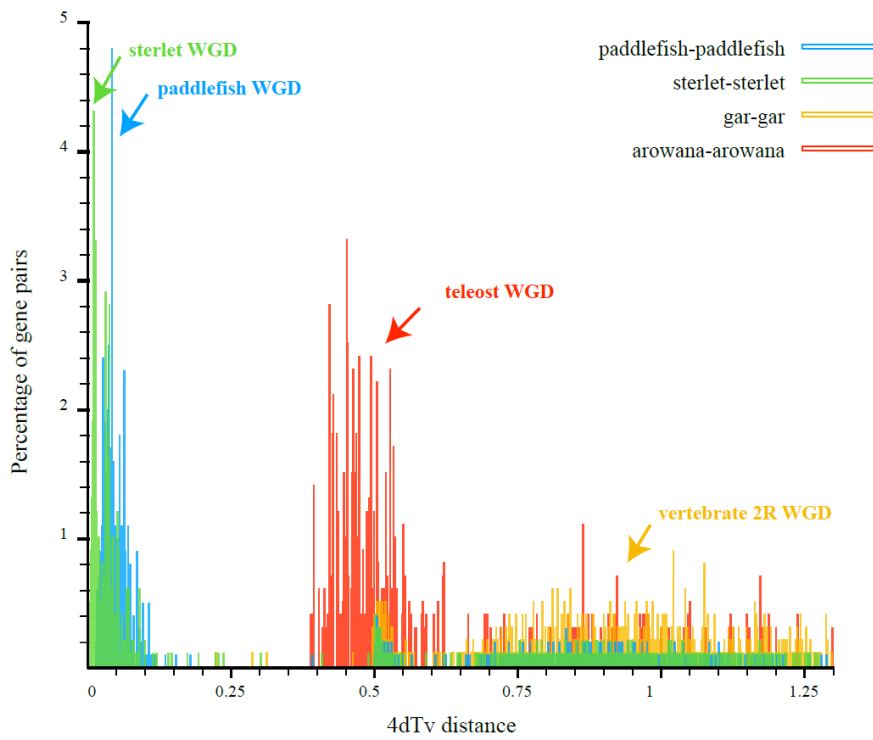

**Figure S19. A 4dTv comparison between paddlefish, sterlet, spotted gar and Asian arowana.** The X-axis denotes 4dTv distance corrected for multiple substitutions. The Y-axis indicates the percentage of gene pairs.

**Table S1.** Sequencing data generated from multiple sequencing platforms and various libraries for the paddlefish genome assembly.

| <b>Sequencing libraries</b> | <b>Insert size</b> | <b>Raw data</b> | <b>Clean data</b> | <b>Mean read length</b> | <b>Sequence Coverage (X)</b> |
|-----------------------------|--------------------|-----------------|-------------------|-------------------------|------------------------------|
| Illumina Hiseq              | 270 bp             | 119.3           | 109.7             | 150 bp                  | 77.5                         |
|                             | 500 bp             | 31.5            | 28.7              | 125 bp                  | 20.4                         |
|                             | 800 bp             | 20.2            | 18.5              | 125 bp                  | 13.1                         |
|                             | 2 kb               | 37.8            | 23.3              | 150 bp                  | 24.5                         |
|                             | 5 kb               | 29.3            | 18.6              | 150 bp                  | 19.0                         |
|                             | 10 kb              | 34.5            | 19.8              | 150 bp                  | 22.4                         |
|                             | 20 kb              | 36.1            | 23.3              | 150 bp                  | 23.4                         |
| PacBio reads                | 30 kb              | 54.3            | 52.1              | 10 kb                   | 35.3                         |
| Hi-C reads                  | 400 bp             | 99.3            | 65.3              | 100 bp                  | 64.5                         |
| Total                       | —                  | 462.3           | 359.3             | —                       | 300.2                        |

**Table S2.** Statistics of the assembled American paddlefish genome.

| <b>Primary genome<br/>assembly</b>          | <b>Scaffold</b>  |               | <b>Contig</b>    |               |
|---------------------------------------------|------------------|---------------|------------------|---------------|
|                                             | <b>Size (bp)</b> | <b>Number</b> | <b>Size (bp)</b> | <b>Number</b> |
| N90                                         | 1,107,274        | 329           | 915,285          | 393           |
| N80                                         | 2,233,615        | 231           | 17,495,24        | 272           |
| N70                                         | 3,181,010        | 173           | 2,736,516        | 202           |
| N60                                         | 4,003,436        | 130           | 3,634,998        | 154           |
| N50                                         | 4,861,270        | 95            | 4,296,843        | 114           |
| Longest                                     | 22,462,060       |               | 17,819,526       |               |
| Total Size                                  | 1,540,770,834    |               | 1,540,393,193    |               |
| Number (>100 bp)                            | 1,540,770,834    | 1,176         | 1,540,391,744    | 1,444         |
| Number (> 2,000 bp)                         | 1,540,770,834    | 1,143         | 1,540,391,744    | 1,444         |
| <b>Chromosome-level<br/>genome assembly</b> | <b>Scaffold</b>  |               | <b>Contig</b>    |               |
|                                             | <b>Size (bp)</b> | <b>Number</b> | <b>Size (bp)</b> | <b>Number</b> |
| N90                                         | 7,546,224        | 32            | 255,888          | 706           |
| N80                                         | 30,616,140       | 22            | 870,143          | 395           |
| N70                                         | 36,461,845       | 18            | 1,591,728        | 264           |
| N60                                         | 40,010,000       | 14            | 2,595,000        | 187           |
| N50                                         | 48,906,729       | 10            | 3,441,286        | 136           |
| Longest                                     | 110,695,931      |               | 13,167,000       |               |
| Total Size                                  | 1,542,128,830    |               | 1,540,391,744    |               |
| Number (>100 bp)                            | 1,542,128,830    | 4,253         | 1,540,391,744    | 7,216         |
| Number (> 2,000 bp)                         | 1,541,109,645    | 3,365         | 1,539,159,655    | 6,111         |

**Table S3.** Completeness estimation of the assembled paddlefish genome with BUSCOs.

| <b>Category</b>                     | <b>BUSCOs hits</b> | <b>% of Genome</b> |
|-------------------------------------|--------------------|--------------------|
| Complete BUSCOs (C)                 | 4,295              | 93.7%              |
| Complete and single-copy BUSCOs (S) | 2,333              | 50.9%              |
| Complete and duplicated BUSCOs (D)  | 1,962              | 42.8%              |
| Fragmented BUSCOs (F)               | 106                | 2.3%               |
| Missing BUSCOs (M)                  | 183                | 4.0%               |
| Total BUSCO groups searched         | 4,584              | 100%               |

**Table S4.** Detailed classification of repeat sequences in the American paddlefish genome assembly.

| Type                 | Repeat size (bp) | % of Genome |
|----------------------|------------------|-------------|
| ProteinMask          | 85,284,950       | 5.5303      |
| RepeatMasker         | 181,235,849      | 11.7523     |
| Tandem Repeat Finder | 97,665,649       | 6.3332      |
| <i>De novo</i>       | 536,533,739      | 34.7917     |
| Total                | 592,405,540      | 38.4148     |



**Table S5. Classification of predicted transposable elements in the American paddlefish genome.** Repbase TEs represent RepeatMask against Repbase; Protein TEs represent RepeatProteinMask result against Repbase protein; *De novo* TEs represent RepeatMask against the *de novo* library; Combined TEs are the combined results from these three steps.

| <b>Type</b>  | <b>Rebase TEs<br/>Length (bp)</b> | <b>Protein TEs<br/>Length (bp)</b> | <b><i>De novo</i> TEs<br/>Length (bp)</b> | <b>Combined TEs<br/>Length (bp)</b> | <b>Percent<br/>(of genome)</b> |
|--------------|-----------------------------------|------------------------------------|-------------------------------------------|-------------------------------------|--------------------------------|
| DNA          | 107,598,104                       | 8,941,296                          | 211,415,181                               | 265,537,807                         | 17.2198%                       |
| LINE         | 56,290,337                        | 54,214,152                         | 191,943,903                               | 223,771,095                         | 14.5105%                       |
| SINE         | 1,903,956                         | 0                                  | 2,823,997                                 | 4,603,174                           | 0.2985%                        |
| LTR          | 26,525,675                        | 22,164,366                         | 123,075,347                               | 140,247,770                         | 9.0944%                        |
| Other        | 103,498                           | 0                                  | 1,887                                     | 105,319                             | 0.0068%                        |
| <b>Total</b> | <b>181,235,849</b>                | <b>85,284,950</b>                  | <b>516,612,604</b>                        | <b>541,382,610</b>                  | <b>35.1062%</b>                |

**Table S6.** Statistics of the predicted gene set in the paddlefish genome.

|                                |             |
|--------------------------------|-------------|
| Gene number                    | 26,017      |
| Average gene length            | 16,546 bp   |
| Average coding sequence length | 1,351 bp    |
| Average exon number            | 7.83        |
| Average exon length            | 172.63 bp   |
| Average intron length          | 2,226.57 bp |

**Table S7.** Statistics of gene functional annotations by various databases.

| <b>Values</b> | <b>Total</b> | <b>Swissprot-<br/>Annotated</b> | <b>KEGG-<br/>Annotated</b> | <b>TrEMBL-<br/>Annotated</b> | <b>Interpro-<br/>Annotated</b> | <b>Overall</b> |
|---------------|--------------|---------------------------------|----------------------------|------------------------------|--------------------------------|----------------|
| Number        | 26,017       | 25,491                          | 23,593                     | 25,848                       | 23,683                         | 25,886         |
| Percentage    | 100%         | 97.98%                          | 90.68%                     | 99.35%                       | 91.03%                         | 99.50%         |

**Table S8.** Statistics of distinguishable macro- and micro-chromosomes from the Hi-C assembly.

| Chr ID       | Length (bp) | of genome (%) | GC (%) | Gene number | Repeats (%) |       |       |       |       |
|--------------|-------------|---------------|--------|-------------|-------------|-------|-------|-------|-------|
|              |             |               |        |             | SINE        | LTR   | LINE  | DNA   | All   |
| scaffolds_1  | 110672920   | 7.1781        | 38.17  | 1237        | 0.14        | 10.38 | 17.14 | 19.13 | 40.61 |
| scaffolds_2  | 109120529   | 7.0775        | 38.13  | 1245        | 0.22        | 10.15 | 17.89 | 18.92 | 40.58 |
| scaffolds_3  | 97700507    | 6.3373        | 38.15  | 1086        | 0.15        | 10.47 | 16.67 | 19.26 | 40.36 |
| scaffolds_4  | 97665480    | 6.3344        | 38.07  | 1096        | 0.15        | 10.31 | 16.81 | 18.92 | 40.13 |
| scaffolds_5  | 79719676    | 5.1706        | 38.08  | 931         | 0.15        | 9.61  | 16.65 | 19.08 | 39.81 |
| scaffolds_6  | 77117782    | 5.0015        | 38.02  | 895         | 0.15        | 9.64  | 15.92 | 18.66 | 38.65 |
| scaffolds_7  | 60046701    | 3.8948        | 38.68  | 951         | 0.16        | 9.09  | 13.91 | 17.27 | 35.46 |
| scaffolds_8  | 51457065    | 3.3386        | 38.66  | 902         | 0.29        | 9.02  | 12.54 | 17.73 | 35.27 |
| scaffolds_9  | 51414706    | 3.3375        | 37.88  | 699         | 0.18        | 9.37  | 14.74 | 17.79 | 36.98 |
| scaffolds_10 | 48894390    | 3.1714        | 38.32  | 859         | 0.15        | 8.56  | 12.79 | 16.73 | 33.48 |
| scaffolds_11 | 47447217    | 3.0776        | 38.20  | 848         | 0.14        | 8.30  | 12.03 | 17.65 | 33.20 |
| scaffolds_12 | 46382132    | 3.0085        | 38.91  | 959         | 0.23        | 7.53  | 11.04 | 16.27 | 31.03 |
| scaffolds_13 | 44682680    | 2.8981        | 38.55  | 819         | 0.21        | 8.51  | 12.54 | 15.95 | 32.32 |
| scaffolds_14 | 39999976    | 2.5945        | 38.53  | 772         | 0.14        | 8.57  | 12.93 | 16.42 | 33.23 |
| scaffolds_15 | 39452593    | 2.5588        | 37.98  | 511         | 0.13        | 9.83  | 15.59 | 17.80 | 37.84 |
| scaffolds_16 | 38779357    | 2.5159        | 39.81  | 812         | 0.45        | 5.73  | 9.72  | 13.21 | 26.80 |
| scaffolds_17 | 37776802    | 2.4505        | 38.84  | 711         | 0.19        | 8.15  | 12.15 | 15.86 | 32.10 |
| scaffolds_18 | 36445344    | 2.3644        | 38.97  | 705         | 0.25        | 8.15  | 12.30 | 15.77 | 32.22 |
| scaffolds_19 | 35369582    | 2.2943        | 38.95  | 647         | 0.14        | 7.60  | 12.50 | 16.22 | 32.10 |
| scaffolds_20 | 31159239    | 2.0215        | 39.23  | 549         | 0.23        | 7.74  | 11.91 | 14.69 | 30.35 |
| scaffolds_21 | 30701252    | 1.9916        | 39.00  | 556         | 0.19        | 8.20  | 13.52 | 14.40 | 31.78 |
| scaffolds_22 | 30597109    | 1.9853        | 39.41  | 624         | 0.19        | 8.03  | 13.40 | 15.21 | 32.31 |
| scaffolds_23 | 28201217    | 1.8299        | 39.36  | 600         | 0.17        | 6.83  | 9.59  | 12.77 | 26.79 |
| scaffolds_24 | 25485446    | 1.6540        | 40.11  | 518         | 0.31        | 8.06  | 14.03 | 15.83 | 34.21 |
| scaffolds_25 | 23799018    | 1.5453        | 41.46  | 641         | 0.26        | 6.96  | 9.76  | 12.10 | 26.53 |
| scaffolds_26 | 20874733    | 1.3556        | 40.00  | 472         | 0.26        | 6.99  | 14.24 | 14.87 | 31.99 |
| scaffolds_27 | 9652038     | 0.6309        | 42.38  | 327         | 0.39        | 5.09  | 8.28  | 12.16 | 24.19 |
| scaffolds_28 | 9241349     | 0.6005        | 40.09  | 234         | 0.34        | 7.37  | 12.66 | 13.88 | 31.64 |
| scaffolds_29 | 8882762     | 0.5774        | 43.41  | 294         | 1.25        | 8.38  | 15.16 | 20.65 | 45.03 |
| scaffolds_30 | 8557350     | 0.5609        | 39.38  | 290         | 0.27        | 4.61  | 5.22  | 10.50 | 19.26 |
| scaffolds_31 | 8583030     | 0.5579        | 41.99  | 199         | 0.92        | 8.90  | 16.97 | 16.82 | 40.24 |
| scaffolds_32 | 7490990     | 0.4893        | 40.92  | 136         | 0.29        | 7.08  | 9.19  | 12.26 | 27.83 |
| scaffolds_33 | 6458086     | 0.4192        | 39.07  | 64          | 0.19        | 7.30  | 19.69 | 15.00 | 37.83 |
| scaffolds_34 | 6343732     | 0.4121        | 40.14  | 29          | 0.56        | 11.55 | 26.62 | 16.54 | 49.01 |
| scaffolds_35 | 5847329     | 0.3808        | 41.41  | 134         | 1.10        | 8.88  | 15.64 | 13.15 | 36.54 |
| scaffolds_36 | 5810723     | 0.3797        | 42.25  | 76          | 0.24        | 6.14  | 8.76  | 13.56 | 28.44 |

---

|              |          |        |       |      |      |       |       |       |       |
|--------------|----------|--------|-------|------|------|-------|-------|-------|-------|
| scaffolds_37 | 5236841  | 0.3413 | 43.11 | 161  | 1.21 | 8.62  | 12.74 | 15.66 | 37.05 |
| scaffolds_38 | 5123632  | 0.3360 | 42.83 | 90   | 0.91 | 9.28  | 19.03 | 17.59 | 44.50 |
| scaffolds_39 | 4985363  | 0.3234 | 41.17 | 112  | 0.38 | 7.72  | 13.21 | 13.57 | 31.91 |
| scaffolds_40 | 4455632  | 0.2893 | 42.04 | 146  | 1.54 | 5.37  | 10.61 | 16.09 | 31.36 |
| scaffolds_41 | 3805706  | 0.2492 | 40.18 | 54   | 0.32 | 6.11  | 13.50 | 11.89 | 29.32 |
| scaffolds_42 | 3499438  | 0.2274 | 42.42 | 98   | 1.97 | 11.17 | 19.40 | 20.43 | 52.49 |
| scaffolds_43 | 3433677  | 0.2250 | 43.65 | 123  | 2.37 | 12.35 | 18.31 | 24.22 | 54.78 |
| scaffolds_44 | 3390696  | 0.2210 | 44.61 | 106  | 2.20 | 8.05  | 20.16 | 22.07 | 52.91 |
| scaffolds_45 | 3150032  | 0.2060 | 44.58 | 89   | 1.67 | 16.34 | 17.71 | 24.68 | 61.95 |
| scaffolds_46 | 2980232  | 0.1961 | 44.56 | 99   | 0.82 | 11.07 | 15.62 | 30.90 | 60.15 |
| scaffolds_47 | 2846283  | 0.1887 | 44.12 | 89   | 1.02 | 11.05 | 19.31 | 18.47 | 50.37 |
| scaffolds_48 | 2650282  | 0.1723 | 44.57 | 102  | 2.81 | 8.88  | 17.79 | 21.16 | 49.95 |
| scaffolds_49 | 2640359  | 0.1722 | 41.52 | 58   | 0.22 | 3.38  | 3.24  | 10.28 | 16.25 |
| scaffolds_50 | 2595998  | 0.1687 | 43.27 | 68   | 1.09 | 12.40 | 27.27 | 23.58 | 61.92 |
| scaffolds_51 | 2344646  | 0.1536 | 45.90 | 83   | 1.69 | 10.19 | 14.78 | 22.69 | 47.54 |
| scaffolds_52 | 2152814  | 0.1396 | 39.14 | 38   | 0.20 | 7.11  | 25.19 | 8.17  | 36.72 |
| scaffolds_53 | 2057129  | 0.1353 | 42.49 | 56   | 1.48 | 9.28  | 16.71 | 14.91 | 39.27 |
| scaffolds_54 | 2027415  | 0.1341 | 44.63 | 59   | 0.95 | 15.82 | 22.39 | 22.66 | 64.54 |
| scaffolds_55 | 1901070  | 0.1237 | 42.64 | 64   | 0.24 | 11.84 | 21.60 | 19.75 | 49.39 |
| scaffolds_56 | 1836670  | 0.1195 | 38.04 | 37   | 0.21 | 2.68  | 4.50  | 8.91  | 15.91 |
| scaffolds_57 | 1669624  | 0.1104 | 42.17 | 79   | 0.23 | 4.30  | 5.48  | 9.55  | 18.00 |
| scaffolds_58 | 1264954  | 0.0835 | 43.19 | 73   | 0.32 | 2.43  | 3.25  | 5.24  | 10.72 |
| scaffolds_59 | 1165121  | 0.0769 | 43.30 | 64   | 1.15 | 5.24  | 4.34  | 9.84  | 18.47 |
| scaffolds_60 | 1176238  | 0.0767 | 41.20 | 5    | 0.14 | 12.99 | 42.50 | 9.05  | 58.22 |
| unanchored   | 54172499 | 3.5339 | 42.69 | 1636 | 1.58 | 13.32 | 15.46 | 17.20 | 45.96 |

---

**Table S9.** Statistics of gene sets clustering among paddlefish and other vertebrates.

| Species                       | Total genes | Clustered genes | Unclassified genes | Family No. | Unique families | Average genes/family |
|-------------------------------|-------------|-----------------|--------------------|------------|-----------------|----------------------|
| <i>Astyanax mexicanus</i>     | 23041       | 20305           | 2736               | 14248      | 77              | 1.43                 |
| <i>Danio rerio</i>            | 25709       | 24391           | 1318               | 14691      | 181             | 1.66                 |
| <i>Gadus morhua</i>           | 20083       | 18515           | 1568               | 13538      | 41              | 1.37                 |
| <i>Gasterosteus aculeatus</i> | 20785       | 19908           | 877                | 13982      | 28              | 1.42                 |
| <i>Latimeria chalumnae</i>    | 19568       | 18516           | 1052               | 13307      | 136             | 1.39                 |
| <i>Lepisosteus oculatus</i>   | 18341       | 17532           | 809                | 13817      | 53              | 1.27                 |
| <i>Oreochromis niloticus</i>  | 21437       | 20816           | 621                | 13776      | 68              | 1.51                 |
| <i>Oryzias latipes</i>        | 19682       | 18404           | 1278               | 13079      | 110             | 1.41                 |
| <i>Pelodiscus sinensis</i>    | 18177       | 17017           | 1160               | 12420      | 78              | 1.37                 |
| <i>Poecilia formosa</i>       | 23613       | 22894           | 719                | 15381      | 78              | 1.49                 |
| <i>Taeniopygia guttata</i>    | 17472       | 15226           | 2246               | 11515      | 68              | 1.32                 |
| <i>Takifugu rubripes</i>      | 18518       | 18065           | 453                | 12724      | 28              | 1.42                 |
| <i>Tetraodon nigroviridis</i> | 19595       | 18051           | 1544               | 12827      | 46              | 1.41                 |
| <i>Xenopus tropicalis</i>     | 18442       | 17667           | 775                | 12026      | 143             | 1.47                 |
| <i>Xiphophorus maculatus</i>  | 20379       | 19917           | 462                | 14601      | 8               | 1.36                 |
| <i>Bos taurus</i>             | 19981       | 18954           | 1027               | 14357      | 140             | 1.32                 |
| <i>Callorhynchus milii</i>    | 19491       | 16111           | 3380               | 12717      | 102             | 1.27                 |
| <i>Rhincodon typus</i>        | 23554       | 19922           | 3632               | 13352      | 196             | 1.49                 |
| <i>Gallus gallus</i>          | 18342       | 17042           | 1300               | 12384      | 143             | 1.38                 |
| <i>Homo sapiens</i>           | 19696       | 18762           | 934                | 14446      | 128             | 1.3                  |
| <i>Petromyzon marinus</i>     | 10202       | 7812            | 2390               | 6354       | 98              | 1.23                 |
| <i>Scleropages formosus</i>   | 22016       | 18680           | 3336               | 12939      | 26              | 1.44                 |
| <i>Acipenser ruthenus</i>     | 36020       | 33974           | 2046               | 15053      | 476             | 2.26                 |
| <i>Polyodon spathula</i>      | 26017       | 22772           | 3245               | 12314      | 240             | 1.85                 |

**Table S10.** Information of *spp1* and nearby genes in the American paddlefish and the spotted gar.

| Gene               | American paddlefish Chr1 |            |        | American paddlefish Chr2 |            |        | Spotted gar LG2      |
|--------------------|--------------------------|------------|--------|--------------------------|------------|--------|----------------------|
|                    | Loci-start               | Loci-end   | Strand | Loci-start               | Loci-end   | Strand | Ensembl Accession    |
| <i>pde6b</i>       | 34,284,708               | 34,300,583 | +      | 94,947,096               | 94,962,291 | +      | ENSLOCG00000012238.1 |
| <i>paip1</i>       | 37,748,735               | 37,761,145 | +      | 97,855,103               | 97,868,316 | +      | ENSLOCG00000012270.1 |
| <i>nnt</i>         | 37,668,439               | 37,739,278 | -      | 97,804,118               | 97,845,883 | -      | ENSLOCG00000012282.1 |
| <i>fgf10b</i>      | 37,526,734               | 37,545,640 | +      | 97,677,570               | 97,696,560 | +      | ENSLOCG00000012296.1 |
| <i>rai14</i>       | 12,577,675               | 12,602,135 | +      | 93,268,768               | 93,299,105 | -      | ENSLOCG00000012300.1 |
| <i>amacr</i>       | 12,480,133               | 12,481,995 | -      | 93,434,198               | 93,457,638 | +      | ENSLOCG00000012318.1 |
| <i>slc45a2</i>     | -                        | -          | /      | 93,466,230               | 93,477,800 | +      | ENSLOCG00000012323.1 |
| <i>rxfp3</i>       | 12,453,547               | 12,454,770 | +      | 93,488,971               | 93,490,194 | -      | ENSLOCG00000017549.1 |
| <i>adamts12</i>    | 12,371,075               | 12,443,824 | -      | 93,500,796               | 93,657,994 | +      | ENSLOCG00000012331.1 |
| <i>gzmk</i>        | 12,304,636               | 12,306,825 | -      | 93,700,692               | 93,703,481 | +      | ENSLOCG00000012345.1 |
| <i>tmem267</i>     | 12,607,896               | 12,609,002 | +      | 93,262,275               | 93,263,370 | -      | ENSLOCG00000012351.1 |
| <i>il11ra</i>      | 12,625,999               | 12,647,803 | -      | 93,230,840               | 93,249,510 | +      | ENSLOCG00000012354.1 |
| <i>cntfr</i>       | 12,749,080               | 12,815,479 | -      | 93,061,830               | 93,130,334 | +      | ENSLOCG00000012362.1 |
| <i>galt</i>        | 13,044,212               | 13,092,130 | -      | 92,731,420               | 92,795,164 | +      | ENSLOCG00000012369.1 |
| <i>sigmar1</i>     | 13,095,637               | 13,098,663 | +      | 92,724,416               | 92,728,361 | -      | ENSLOCG00000012381.1 |
| <i>katnal2</i>     | 13,103,619               | 13,110,073 | +      | 92,708,248               | 92,720,999 | -      | ENSLOCG00000012385.1 |
| <i>hdhd2</i>       | 13,117,348               | 13,121,381 | -      | 92,695,065               | 92,702,379 | +      | ENSLOCG00000012392.1 |
| <i>smad2</i>       | 13,338,992               | 13,372,800 | -      | 92,454,095               | 92,479,175 | +      | ENSLOCG00000012409.1 |
| <i>cldn23a</i>     | 16,461,492               | 16,462,307 | -      | 89,149,347               | 89,150,138 | +      | ENSLOCG00000017550.1 |
| <i>rchyl</i>       | 53665995                 | 53685398   | +      | 57,502,034               | 57,524,301 | -      | ENSLOCG00000012485.1 |
| <b><i>spp1</i></b> | 53,659,617               | 53,663,837 | +      | 57,527,701               | 57,531,323 | -      | ENSLOCG00000012495.1 |
| <i>sh3bp2</i>      | 53,536,882               | 53,571,399 | -      | 57,647,785               | 57,669,358 | +      | ENSLOCG00000012502.1 |
| <i>vldlr</i>       | 16,420,627               | 16,442,388 | +      | 60,663,138               | 60,776,072 | +      | ENSLOCG00000012505.1 |
| <i>kcnv2a</i>      | -                        | -          | /      | 60,820,201               | 60,823,162 | +      | ENSLOCG00000012521.1 |
| <i>pum3</i>        | 49,281,384               | 49,310,937 | +      | 60,850,489               | 60,903,977 | -      | ENSLOCG00000012529.1 |
| <i>carm11</i>      | -                        | -          | /      | -                        | -          | /      | ENSLOCG00000012543.1 |
| <i>fybb</i>        | 38,922,582               | 38,949,320 | -      | 98,892,074               | 98,917,662 | -      | ENSLOCG00000012577.1 |
| <i>ricorb</i>      | 38,834,090               | 38,907,004 | -      | 98,799,509               | 98,875,202 | -      | ENSLOCG00000012599.1 |
| <i>osmr</i>        | 38,799,782               | 38,824,377 | +      | 98,739,106               | 98,763,688 | -      | ENSLOCG00000012617.1 |
| <i>lifra</i>       | 38,723,782               | 38,746,894 | -      | 98,733,816               | 98,766,722 | -      | ENSLOCG00000012627.1 |
| <i>egflam</i>      | 38,668,095               | 38,713,126 | +      | 98,673,535               | 98,725,395 | +      | ENSLOCG00000012642.1 |
| <i>gdnfa</i>       | 38,574,448               | 38,576,900 | -      | 98,597,727               | 98,600,850 | -      | ENSLOCG00000012652.1 |
| <i>wdr70</i>       | 38,435,361               | 38,549,239 | +      | 98,444,378               | 98,571,409 | +      | ENSLOCG00000012656.1 |
| <i>nup155</i>      | 38,403,642               | 38,432,304 | -      | 98,412,648               | 98,439,874 | -      | ENSLOCG00000012677.1 |
| <i>cplane1</i>     | 38,350,826               | 38,393,368 | -      | -                        | -          | /      | ENSLOCG00000012697.1 |
| <i>nipbla</i>      | 38,284,525               | 38,346,098 | +      | 98,332,173               | 98,397,179 | +      | ENSLOCG00000012704.1 |
| <i>slc1a3b</i>     | 38,193,618               | 38,221,938 | +      | 98,216,541               | 98,248,015 | +      | ENSLOCG00000012724.1 |
| <i>ranbp3l</i>     | -                        | -          | /      | 98,132,763               | 98,136,729 | -      | ENSLOCG00000012736.1 |
| <i>nadk2</i>       | 38,099,489               | 38,110,368 | -      | 98,111,707               | 98,122,098 | -      | ENSLOCG00000012738.1 |
| <i>skp2</i>        | 38,085,948               | 38,092,188 | +      | 98,099,415               | 98,104,589 | +      | ENSLOCG00000012750.1 |
| <i>lmbrd2a</i>     | 38,054,460               | 38,078,282 | -      | 98,070,106               | 98,091,808 | -      | ENSLOCG00000012758.1 |

**Table S11.** Primers used for amplification of *spp1-1* and *spp1-2*.

| <b>Target Gene</b> | <b>Method</b> | <b>Primer</b> | <b>Sequence</b>            | <b>Location (bp)</b>     | <b>Length (bp)</b> |     |
|--------------------|---------------|---------------|----------------------------|--------------------------|--------------------|-----|
| <i>spp1-1</i>      | nested-1      | nested-F1     | ATGAATACAGCAATTCTGTTATTCT  | 1..3285                  | 3285               |     |
|                    |               | nested-R1     | TTGCTAGATTGTCACCCCTGTC     |                          |                    |     |
|                    | nested-2      | nested-F2     | CCTTCCAGTGAGTATTTTACTTTTGT | 48..3208                 | 3161               |     |
|                    |               | nested-R2     | GTCGGTTGTGCCGTTGTG         |                          |                    |     |
|                    | 4224bp        | PCR           | Chr1-F1                    | ATGAATACAGCAATTCTGTTATTC | 1..717             | 717 |
|                    |               |               | Chr1-R1                    | TATTGATTGATGTATGACAAAGAC |                    |     |
| Chr1-F2            |               |               | ATAGTACCGTACAAATAGTGTATG   | 2994..3705               | 712                |     |
| Chr1-R2            |               |               | ACATGGTGGCCCACTTATTCATGA   |                          |                    |     |
| Chr1-F3            |               |               | TATTAATGCATTCATGTTGACTGT   | 3511..4224               | 714                |     |
| Chr1-R3            |               |               | TTACTTTTATTTTCAGTGACTGAGC  |                          |                    |     |
| <i>spp1-2</i>      | nested-1      | nested-F1     | ATGAATACAACAATTCTGATATTCT  | 1..3962                  | 3962               |     |
|                    |               | nested-R1     | TTACTTTTGTTCAGTGACTGAGCA   |                          |                    |     |
|                    | nested-2      | nested-F2     | GAGGAACAGGTATGCAGGTTGT     | 197..3726                | 3530               |     |
|                    |               | nested-R2     | TGTCATCACTTTCTTTGGGAGC     |                          |                    |     |
|                    | 3962bp        | PCR           | Chr2-F1                    | ATGAATACAACAATTCTGATATTC | 1..718             | 718 |
|                    |               |               | Chr2-R1                    | CTTAAGTCCCAAATAGTCAATGT  |                    |     |
| Chr2-F2            |               |               | ATTAATGTATTAATTTTGACTCTGAT | 3243..3962               | 720                |     |
| Chr2-R2            |               |               | TTACTTTTGTTCAGTGACTGAGC    |                          |                    |     |
